# Supplementary material for: The effect of co-adsorbed solvent molecules on H2 binding to metal alkoxides
Source: Royal Society of Chemistry journal article supplement (doi:10.1039/c9cp00754g), 2019-01-01

Supporting Information for

**The Effect of Co-adsorbed Solvent Molecules on H<sub>2</sub> Binding to Metal Alkoxides**

Yamil J. Colón and Randall Q. Snurr

S1. Comparison between MP2/6-311++G(d,p) and M06/6-311+G(d,p)

Binding energies of solvent molecules onto Zn alkoxide were calculated at the MP2/6-311+G(d,p) and M06/6-311++G(d,p) levels of theory. Table S1 shows the results. The resulting binding energies are in reasonable agreement, with the biggest difference obtained for the binding energy of chloroform.

**Table S1.** Solvent binding energies onto Zn alkoxide calculated with MP2 and M06.

| Solvent           | MP2 (kJ/mol) | M06 (kJ/mol) |
|-------------------|--------------|--------------|
| CHCl <sub>3</sub> | -85.3        | -73.8        |
| DMF               | -161.4       | -166.8       |
| Ethanol           | -133.7       | -134.8       |
| Methanol          | -123.8       | -127.4       |
| H <sub>2</sub> O  | -108.7       | -110.3       |

S2. Solvent Release Temperatures

**Table S2.** Temperature (K) to drive solvent off of metal alkoxides

|                   | Li  | Mg   | Zn   | Cu  | Ni   |
|-------------------|-----|------|------|-----|------|
| CHCl <sub>3</sub> | 253 | 482  | 447  | 518 | 597  |
| DMF               | 866 | 1339 | 1177 | 756 | 1005 |
| Ethanol           | 480 | 1030 | 840  | 575 | 833  |
| Methanol          | 567 | 957  | 862  | 623 | 809  |
| H <sub>2</sub> O  | 509 | 1050 | 833  | 596 | 826  |

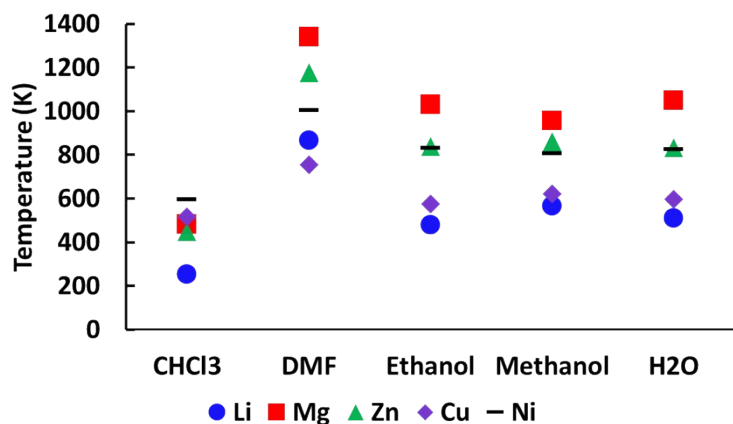

**Figure S1.** Solvent release temperature of solvent molecule from metal alkoxides.

### S3. Hydrogen Binding Energies onto Solvent-Metal Alkoxide Complexes

Hydrogen binding energies onto solvent-metal alkoxide complexes are reported in Table S3. Calculations involving Li, Mg, and Zn were performed at the MP2 level of theory, while calculations for Cu and Ni were performed using M06.

**Table S3.** Hydrogen binding energies (kJ/mol) onto solvent-metal alkoxide complexes

|                   | Li    | Mg    | Zn   | Cu    | Ni    |
|-------------------|-------|-------|------|-------|-------|
| CHCl <sub>3</sub> | -9.5  | -16.2 | -5.2 | -10.3 | -9.4  |
| DMF               | -19.2 | -8.1  | -1.9 | -10.5 | -64.5 |
| Ethanol           | -7.2  | -8.4  | -5.9 | -8.2  | -68.5 |
| Methanol          | -7.4  | -11.1 | -5.3 | -7.9  | -71.8 |
| H <sub>2</sub> O  | -8.9  | -13.9 | -6.7 | -6.0  | -71.1 |

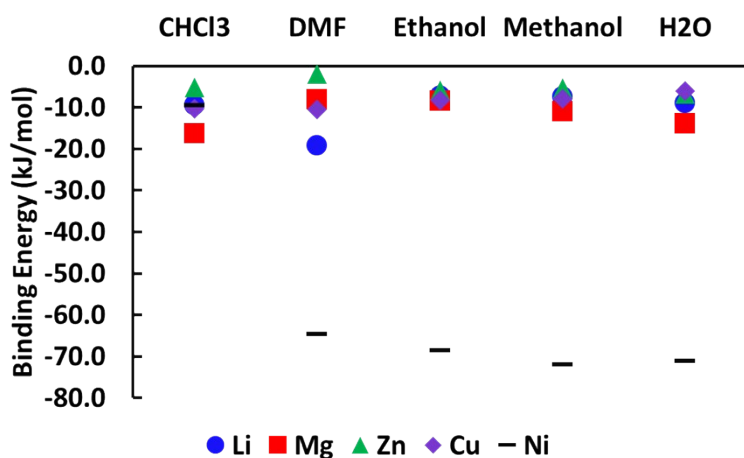

**Figure S2.** Hydrogen binding energy onto solvent-metal alkoxide complexes.

## S4. Optimized configurations

### Solvent onto metal alkoxide

#### CHCl<sub>3</sub>\_Li

```
C 6.8605200000 0.5195210000 -1.4890170000
C 8.2308980000 0.2783770000 -1.3522260000
C 9.1238550000 1.3165840000 -1.0018010000
C 8.5739780000 2.5961940000 -0.7562960000
C 7.2020660000 2.8327310000 -0.8926740000
C 6.3314380000 1.7933360000 -1.2430320000
H 6.1994320000 -0.2994650000 -1.7644110000
H 8.6401080000 -0.7125860000 -1.5373690000
H 9.2510290000 3.4071090000 -0.4935430000
H 6.8105360000 3.8297830000 -0.7025350000
H 5.2661650000 1.9779810000 -1.3488460000
O 10.4254290000 1.0959390000 -0.8659840000
Li 12.0376280000 0.6884740000 -0.9147790000
C 11.3273090000 1.6230810000 2.0168000000
H 10.6568880000 1.5777740000 1.1588040000
Cl 10.7672790000 0.5284730000 3.2663160000
Cl 12.9282260000 1.0714030000 1.3833160000
Cl 11.4486260000 3.2776150000 2.5873740000
```

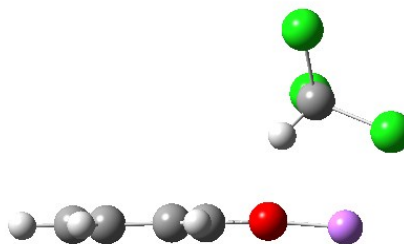

#### CHCl<sub>3</sub>\_Mg

```
C 7.3294170000 0.4295970000 -1.7440360000
C 8.5635870000 0.4626130000 -1.0797740000
C 9.0069320000 1.7008410000 -0.5071990000
C 8.2352460000 2.8561560000 -0.6799180000
C 7.0058890000 2.8020820000 -1.3498920000
C 6.5670910000 1.5937860000 -1.9052720000
H 7.0062330000 -0.5192000000 -2.1655420000
H 8.5975710000 3.7834640000 -0.2418490000
H 6.4174400000 3.7079040000 -1.4709630000
H 5.6152750000 1.5451550000 -2.4280960000
O 10.2010300000 1.7327880000 0.1632730000
O 9.3175350000 -0.6675990000 -0.9419040000
Mg 10.8020180000 -0.0602820000 0.0402030000
C 12.6792570000 2.1092490000 1.6758150000
H 11.7246310000 2.3450630000 1.1972630000
Cl 12.5814560000 2.3597720000 3.3981020000
Cl 12.9302700000 0.3019870000 1.3502020000
Cl 13.9777020000 2.9992630000 0.9270980000
```

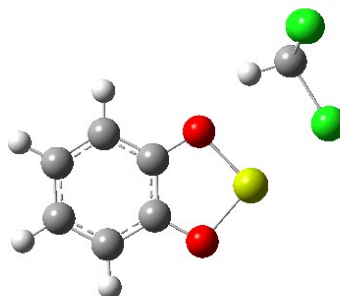

### CHCl<sub>3</sub>\_Zn

|    |               |               |               |
|----|---------------|---------------|---------------|
| C  | 7.1039760000  | 0.4362150000  | -2.1200220000 |
| C  | 8.0292690000  | 0.1752840000  | -1.1025350000 |
| C  | 8.3784390000  | 1.2157360000  | -0.1876340000 |
| C  | 7.8324690000  | 2.4934420000  | -0.3555290000 |
| C  | 6.9093700000  | 2.7400970000  | -1.3790430000 |
| C  | 6.5640720000  | 1.7188410000  | -2.2741710000 |
| H  | 6.8487970000  | -0.3716630000 | -2.8010130000 |
| H  | 8.1165010000  | 3.2715500000  | 0.3487520000  |
| H  | 6.4901850000  | 3.7358370000  | -1.4965200000 |
| H  | 5.8491790000  | 1.9080880000  | -3.0704900000 |
| O  | 9.2697150000  | 0.9456720000  | 0.8171890000  |
| O  | 8.5734730000  | -1.0771890000 | -0.9607400000 |
| Zn | 9.6523040000  | -0.8575390000 | 0.5047070000  |
| C  | 11.1931930000 | 0.2890360000  | 3.0246180000  |
| H  | 10.5026080000 | 0.8781710000  | 2.4191780000  |
| Cl | 10.6126590000 | 0.1685160000  | 4.6638940000  |
| Cl | 11.1749720000 | -1.3935150000 | 2.2580630000  |
| Cl | 12.8048760000 | 0.9438080000  | 2.9141670000  |

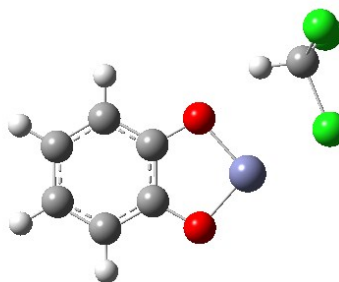

### CHCl<sub>3</sub>\_Cu

|    |               |               |               |
|----|---------------|---------------|---------------|
| C  | 7.0353440000  | 0.4311490000  | -1.9797280000 |
| C  | 8.0388760000  | 0.1783170000  | -1.0094250000 |
| C  | 8.4590080000  | 1.2833110000  | -0.1187620000 |
| C  | 7.8318400000  | 2.5497590000  | -0.2794910000 |
| C  | 6.8710920000  | 2.7348120000  | -1.2323340000 |
| C  | 6.4706490000  | 1.6709190000  | -2.0861510000 |
| H  | 6.7415450000  | -0.3916310000 | -2.6239590000 |
| H  | 8.1468250000  | 3.3527460000  | 0.3799430000  |
| H  | 6.4007430000  | 3.7071890000  | -1.3454240000 |
| H  | 5.7038390000  | 1.8537350000  | -2.8330020000 |
| O  | 9.3552150000  | 1.0581740000  | 0.7473410000  |
| O  | 8.5863010000  | -0.9655670000 | -0.8855000000 |
| Cu | 9.9222880000  | -0.9987870000 | 0.5002890000  |
| C  | 11.2782470000 | 0.2565110000  | 2.8920550000  |
| H  | 10.8833390000 | 0.9489610000  | 2.1467920000  |
| Cl | 10.0751760000 | 0.0095890000  | 4.1399290000  |
| Cl | 11.5501080000 | -1.3284480000 | 1.9706930000  |
| Cl | 12.8152550000 | 0.8148430000  | 3.5227440000  |

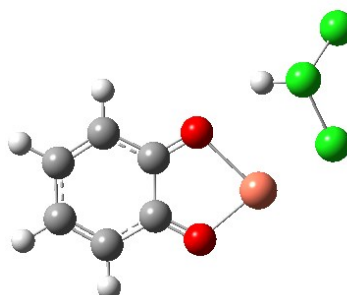

### CHCl<sub>3</sub>\_Ni

|    |               |               |               |
|----|---------------|---------------|---------------|
| C  | 7.7452230000  | 0.1458800000  | -1.0053950000 |
| C  | 9.0731450000  | 0.5127740000  | -1.1327180000 |
| C  | 9.4237160000  | 1.8306430000  | -1.4279630000 |
| C  | 8.4511030000  | 2.7993750000  | -1.5998760000 |
| C  | 7.1119870000  | 2.4317620000  | -1.4721440000 |
| C  | 6.7632380000  | 1.1206070000  | -1.1778410000 |
| H  | 7.4923210000  | -0.8849040000 | -0.7751890000 |
| H  | 8.7435760000  | 3.8199910000  | -1.8284030000 |
| H  | 6.3378830000  | 3.1818060000  | -1.6039950000 |
| H  | 5.7167220000  | 0.8475280000  | -1.0809100000 |
| O  | 10.7560510000 | 2.0591050000  | -1.5246850000 |
| O  | 10.1180910000 | -0.3379050000 | -0.9879690000 |
| Ni | 11.6382140000 | 0.5481460000  | -1.2252540000 |
| C  | 14.4398340000 | -0.2237690000 | -1.3432870000 |
| H  | 14.7700690000 | -0.5298020000 | -2.3334750000 |
| Cl | 13.7783970000 | 1.4481040000  | -1.4828840000 |
| Cl | 13.0520630000 | -1.2781990000 | -0.8822630000 |
| Cl | 15.7540560000 | -0.3255600000 | -0.2097370000 |

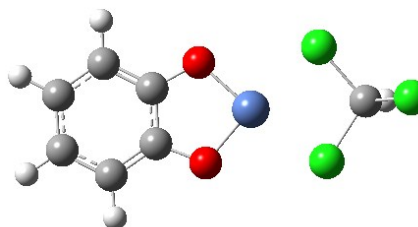

## DMF\_Li

|    |               |               |               |
|----|---------------|---------------|---------------|
| C  | 7.5040520000  | 0.6903330000  | -0.8430670000 |
| C  | 8.8625790000  | 0.5006470000  | -1.1143000000 |
| C  | 9.5990720000  | 1.4267710000  | -1.8956120000 |
| C  | 8.9026330000  | 2.5760250000  | -2.3481230000 |
| C  | 7.5440510000  | 2.7624480000  | -2.0749590000 |
| C  | 6.8348880000  | 1.8325590000  | -1.3027950000 |
| H  | 6.9715240000  | -0.0466900000 | -0.2445470000 |
| H  | 9.3795580000  | -0.3866310000 | -0.7537990000 |
| H  | 9.4508180000  | 3.3012760000  | -2.9464340000 |
| H  | 7.0429590000  | 3.6550610000  | -2.4453140000 |
| H  | 5.7788620000  | 1.9781650000  | -1.0921460000 |
| O  | 10.8715380000 | 1.2401000000  | -2.1687040000 |
| Li | 12.5000590000 | 1.0103330000  | -2.4827760000 |
| N  | 16.5902150000 | 1.4338500000  | -1.7785200000 |
| C  | 17.5319300000 | 2.0383920000  | -0.8487510000 |
| H  | 16.9854370000 | 2.5625080000  | -0.0630340000 |
| H  | 18.1576660000 | 1.2653060000  | -0.3932890000 |
| H  | 18.1723250000 | 2.7522810000  | -1.3749710000 |
| C  | 17.1423600000 | 0.6875730000  | -2.9008600000 |
| H  | 17.7519490000 | -0.1405680000 | -2.5280930000 |
| H  | 16.3214490000 | 0.2990300000  | -3.5013230000 |
| H  | 17.7662360000 | 1.3474880000  | -3.5105000000 |
| C  | 15.2656490000 | 1.5574740000  | -1.6102160000 |
| H  | 14.9914280000 | 2.1458960000  | -0.7228980000 |
| O  | 14.4088890000 | 1.0704650000  | -2.3601730000 |

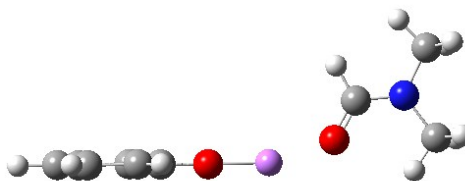

## DMF\_Mg

|    |               |              |               |
|----|---------------|--------------|---------------|
| C  | 7.7350940000  | 0.5942900000 | -2.3394320000 |
| C  | 8.9208400000  | 0.9063020000 | -1.6577670000 |
| C  | 8.8352890000  | 1.4268810000 | -0.3208120000 |
| C  | 7.5732110000  | 1.6789370000 | 0.2349970000  |
| C  | 6.3998850000  | 1.3636640000 | -0.4652800000 |
| C  | 6.4817940000  | 0.8497500000 | -1.7652440000 |
| H  | 7.8213430000  | 0.1932700000 | -3.3469200000 |
| H  | 7.5334810000  | 2.0803880000 | 1.2456610000  |
| H  | 5.4310050000  | 1.5628700000 | -0.0134820000 |
| H  | 5.5766180000  | 0.6039450000 | -2.3155220000 |
| O  | 9.9839710000  | 1.7063980000 | 0.3546430000  |
| O  | 10.1388210000 | 0.6844220000 | -2.2177060000 |
| Mg | 11.3632860000 | 1.2118840000 | -0.8692250000 |
| N  | 13.7252310000 | 2.3795560000 | 1.8399680000  |
| C  | 14.7850220000 | 2.7278380000 | 2.7829980000  |
| H  | 15.7435350000 | 2.3563130000 | 2.4182580000  |
| H  | 14.8359590000 | 3.8146280000 | 2.8878930000  |
| H  | 14.5700430000 | 2.2815030000 | 3.7566900000  |
| C  | 12.3808630000 | 2.8796500000 | 2.1514550000  |
| H  | 12.3027290000 | 3.9291380000 | 1.8533140000  |
| H  | 11.6018570000 | 2.3025920000 | 1.6500670000  |
| H  | 12.2400320000 | 2.8019840000 | 3.2308780000  |
| C  | 14.0158210000 | 1.7350160000 | 0.7182620000  |
| H  | 15.0693470000 | 1.4519110000 | 0.6177600000  |
| O  | 13.2124570000 | 1.4370090000 | -0.1932580000 |

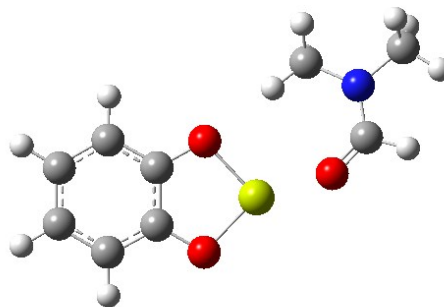

### DMF\_Zn

|    |               |              |               |
|----|---------------|--------------|---------------|
| C  | 7.8656720000  | 0.7691330000 | -2.2906060000 |
| C  | 9.0456310000  | 1.0241980000 | -1.5794380000 |
| C  | 8.9686980000  | 1.3537980000 | -0.1894200000 |
| C  | 7.7126020000  | 1.4748670000 | 0.4192720000  |
| C  | 6.5410870000  | 1.2195640000 | -0.3064180000 |
| C  | 6.6170150000  | 0.8941930000 | -1.6670980000 |
| H  | 7.9478660000  | 0.5137930000 | -3.3443990000 |
| H  | 7.6758160000  | 1.7286740000 | 1.4764500000  |
| H  | 5.5738820000  | 1.3143780000 | 0.1809070000  |
| H  | 5.7106180000  | 0.6963200000 | -2.2338080000 |
| O  | 10.1237300000 | 1.5839030000 | 0.4949550000  |
| O  | 10.2657530000 | 0.9252730000 | -2.1787200000 |
| Zn | 11.4560400000 | 1.2874850000 | -0.8088640000 |
| N  | 13.5641360000 | 2.4483560000 | 1.7519880000  |
| C  | 14.2546160000 | 2.4722320000 | 3.0388110000  |
| H  | 15.0536710000 | 1.7296050000 | 3.0399790000  |
| H  | 14.6803720000 | 3.4637450000 | 3.2091090000  |
| H  | 13.5460140000 | 2.2378400000 | 3.8367900000  |
| C  | 12.4370410000 | 3.3696770000 | 1.5595120000  |
| H  | 12.5049030000 | 3.8126810000 | 0.5638160000  |
| H  | 11.4781330000 | 2.8503770000 | 1.6584580000  |
| H  | 12.5244060000 | 4.1607070000 | 2.3046610000  |
| C  | 13.9085230000 | 1.5766790000 | 0.8169410000  |
| H  | 14.7904600000 | 0.9709850000 | 1.0517290000  |
| O  | 13.3419880000 | 1.4211330000 | -0.2941180000 |

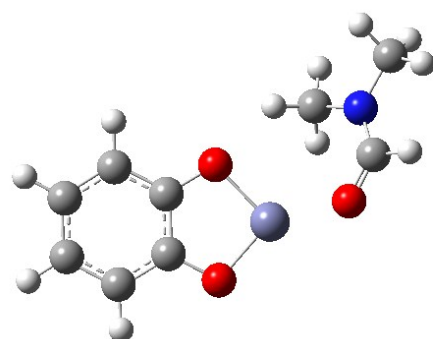

### DMF\_Cu

|    |               |               |               |
|----|---------------|---------------|---------------|
| C  | 8.5309820000  | 0.3947090000  | -2.0250340000 |
| C  | 8.4789180000  | 0.9736170000  | -0.7195190000 |
| C  | 7.5238730000  | 2.0862170000  | -0.5019270000 |
| C  | 6.7210760000  | 2.5162340000  | -1.5887600000 |
| C  | 6.8214940000  | 1.9180300000  | -2.8149140000 |
| C  | 7.7320990000  | 0.8505670000  | -3.0334440000 |
| H  | 9.2327530000  | -0.4204750000 | -2.1763170000 |
| H  | 6.0295970000  | 3.3332050000  | -1.4054500000 |
| H  | 6.1986370000  | 2.2597800000  | -3.6365120000 |
| H  | 7.7882080000  | 0.3964920000  | -4.0187700000 |
| O  | 7.4373970000  | 2.6363750000  | 0.6459990000  |
| O  | 9.2000540000  | 0.5801670000  | 0.2340460000  |
| Cu | 8.5805760000  | 1.9339320000  | 1.9801680000  |
| N  | 11.3585160000 | -0.2814600000 | 3.8180800000  |
| C  | 12.2149400000 | -1.3521550000 | 3.3566350000  |
| H  | 12.0262010000 | -1.5496920000 | 2.2998740000  |
| H  | 13.2683030000 | -1.0790440000 | 3.4826880000  |
| H  | 12.0224130000 | -2.2672610000 | 3.9272760000  |
| C  | 11.4837900000 | 0.1138810000  | 5.2064440000  |
| H  | 12.5037770000 | 0.4584230000  | 5.4075870000  |
| H  | 10.7806420000 | 0.9192730000  | 5.4138670000  |
| H  | 11.2672250000 | -0.7382340000 | 5.8593870000  |
| C  | 10.4926360000 | 0.3144720000  | 2.9985230000  |
| H  | 10.4827750000 | -0.0659870000 | 1.9653980000  |
| O  | 9.7417290000  | 1.2336490000  | 3.3516640000  |

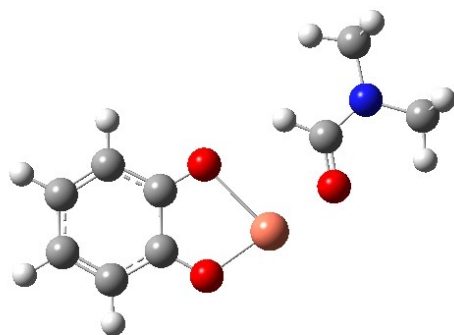

## DMF\_Ni

|    |               |               |               |
|----|---------------|---------------|---------------|
| C  | 7.0590430000  | 0.3892480000  | -0.6288640000 |
| C  | 8.2133450000  | 1.1083220000  | -0.3778000000 |
| C  | 8.5703910000  | 2.2016800000  | -1.1752510000 |
| C  | 7.7848770000  | 2.5551710000  | -2.2602070000 |
| C  | 6.6274850000  | 1.8224360000  | -2.5234230000 |
| C  | 6.2658450000  | 0.7542310000  | -1.7159770000 |
| H  | 6.7961440000  | -0.4492070000 | 0.0103090000  |
| H  | 8.0786170000  | 3.3985640000  | -2.8782490000 |
| H  | 6.0029240000  | 2.0969770000  | -3.3687010000 |
| H  | 5.3607480000  | 0.1934950000  | -1.9308440000 |
| O  | 9.6939880000  | 2.8543450000  | -0.7977820000 |
| O  | 9.0776840000  | 0.8235620000  | 0.6263660000  |
| Ni | 10.4229010000 | 1.9868710000  | 0.5645750000  |
| N  | 11.5595350000 | -0.2323510000 | 3.6291410000  |
| C  | 12.2928520000 | -0.8254120000 | 4.7254130000  |
| H  | 13.2536840000 | -0.3219970000 | 4.8608980000  |
| H  | 11.7195460000 | -0.7453460000 | 5.6560250000  |
| H  | 12.4763870000 | -1.8877550000 | 4.5233910000  |
| C  | 10.2750350000 | -0.8306630000 | 3.2864480000  |
| H  | 9.6016790000  | -0.7640210000 | 4.1478300000  |
| H  | 9.8303250000  | -0.3105840000 | 2.4315340000  |
| H  | 10.4220950000 | -1.8887800000 | 3.0378760000  |
| C  | 12.0451160000 | 0.7868960000  | 2.9270480000  |
| H  | 13.0334570000 | 1.1431440000  | 3.2652350000  |
| O  | 11.4549080000 | 1.3058910000  | 1.9919970000  |

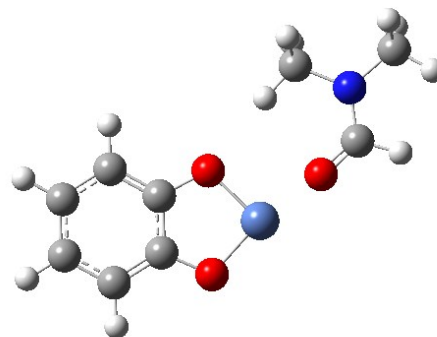

## Ethanol\_Li

|    |               |               |               |
|----|---------------|---------------|---------------|
| C  | 7.2823930000  | 0.2887240000  | -2.3713260000 |
| C  | 8.6293230000  | 0.4218290000  | -2.0206690000 |
| C  | 9.0577400000  | 1.4042380000  | -1.0938900000 |
| C  | 8.0652970000  | 2.2709290000  | -0.5720460000 |
| C  | 6.7189440000  | 2.1343090000  | -0.9248530000 |
| C  | 6.3156700000  | 1.1528280000  | -1.8397320000 |
| H  | 6.9900730000  | -0.4799320000 | -3.0842960000 |
| H  | 9.3792150000  | -0.2463790000 | -2.4394470000 |
| H  | 8.3770140000  | 3.0403580000  | 0.1319010000  |
| H  | 5.9843000000  | 2.8166550000  | -0.5013600000 |
| H  | 5.2695240000  | 1.0485460000  | -2.1140310000 |
| O  | 10.3219050000 | 1.5142860000  | -0.7411990000 |
| Li | 11.8732630000 | 1.6158400000  | -0.1380210000 |
| C  | 11.0485610000 | 0.6060000000  | 2.6360180000  |
| H  | 10.5854160000 | -0.0379100000 | 3.3884480000  |
| H  | 10.4209860000 | 0.5955400000  | 1.7400990000  |
| H  | 11.0887650000 | 1.6243480000  | 3.0299240000  |
| C  | 12.4410350000 | 0.0981020000  | 2.3306570000  |
| H  | 13.0806370000 | 0.1533960000  | 3.2163340000  |
| H  | 12.4136940000 | -0.9357320000 | 1.9738990000  |
| O  | 13.0172490000 | 0.9349180000  | 1.2930880000  |
| H  | 13.9672830000 | 0.7950440000  | 1.2892700000  |

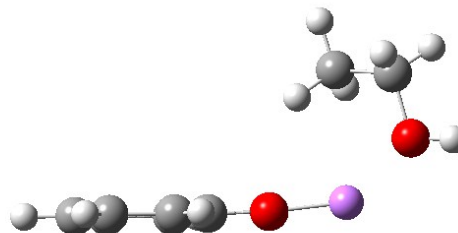

## Ethanol\_Mg

```
C 7.6813430000 0.4997530000 -0.7903370000
C 8.8827720000 1.1802520000 -0.5474020000
C 8.9726140000 2.5769620000 -0.8760800000
C 7.8808130000 3.1994040000 -1.4981480000
C 6.6895850000 2.5003360000 -1.7362520000
C 6.5997900000 1.1417960000 -1.4090030000
H 7.6338230000 -0.5544430000 -0.5260220000
H 7.9740900000 4.2544290000 -1.7458420000
H 5.8544940000 3.0057950000 -2.2152240000
H 5.6792430000 0.5927680000 -1.5918250000
O 10.1228360000 3.2634450000 -0.6203060000
O 9.9480520000 0.5542490000 0.0307350000
Mg 11.2262110000 1.9451450000 0.1638570000
C 12.9406310000 -0.6885850000 0.9917920000
H 13.2360160000 -1.6132560000 1.4946540000
H 13.3664980000 -0.6968370000 -0.0143440000
H 11.8478040000 -0.6773560000 0.9207450000
C 13.4653440000 0.4849330000 1.7867630000
H 13.0806190000 0.4872760000 2.8088520000
H 14.5569590000 0.5005830000 1.8059740000
O 13.0215550000 1.7248360000 1.1385460000
H 13.5927320000 2.4477560000 1.4149810000
```

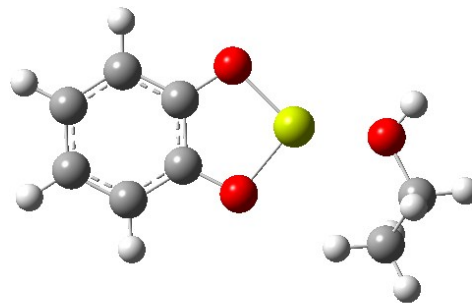

## Ethanol\_Zn

```
C 8.4807320000 -0.1498480000 -1.6214500000
C 9.7840390000 0.3522630000 -1.5142000000
C 9.9800840000 1.7418950000 -1.2350430000
C 8.8669390000 2.5861810000 -1.1338640000
C 7.5698970000 2.0684840000 -1.2455090000
C 7.3775800000 0.7068820000 -1.5151570000
H 8.3550750000 -1.2100300000 -1.8281800000
H 9.0394820000 3.6397250000 -0.9277540000
H 6.7155960000 2.7354030000 -1.1611020000
H 6.3722710000 0.3030220000 -1.6038600000
O 11.2498010000 2.2318600000 -1.1066630000
O 10.8729460000 -0.4630130000 -1.6359600000
Zn 12.2848370000 0.7200450000 -1.3649750000
C 13.8645750000 -1.9921650000 -2.2469070000
H 14.1816250000 -3.0375740000 -2.1992980000
H 14.0363220000 -1.6244920000 -3.2608230000
H 12.7938360000 -1.9501670000 -2.0239990000
C 14.6690220000 -1.1948800000 -1.2474650000
H 14.5264230000 -1.5597850000 -0.2275390000
H 15.7331270000 -1.1967390000 -1.4935900000
O 14.2181750000 0.1980810000 -1.3007280000
H 14.8728470000 0.7737810000 -0.8930190000
```

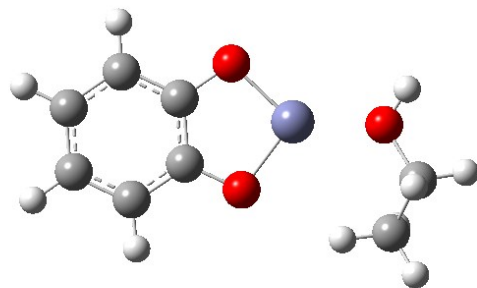



## Ethanol\_Cu

```
C 7.2523670000 0.0037110000 -1.1355560000
C 8.4339380000 0.3631960000 -0.4200450000
C 8.9803100000 1.7232400000 -0.6284870000
C 8.3099840000 2.5979070000 -1.5198830000
C 7.1798790000 2.1920880000 -2.1755010000
C 6.6494420000 0.8882850000 -1.9822390000
H 6.8593520000 -0.9960920000 -0.9762860000
H 8.7275770000 3.5907150000 -1.6580200000
H 6.6764020000 2.8720750000 -2.8565090000
H 5.7506810000 0.5993870000 -2.5195670000
O 10.0355020000 2.0736980000 -0.0036040000
O 9.0239000000 -0.4170970000 0.3745920000
Cu 10.7574260000 0.7183790000 1.1330260000
C 9.8618560000 -1.3403760000 3.4483560000
H 9.3595370000 -2.2604610000 3.7594320000
H 9.1740740000 -0.7869340000 2.8007730000
H 10.0839260000 -0.7466300000 4.3395360000
C 11.1198890000 -1.6763240000 2.7028480000
H 11.8144850000 -2.2563520000 3.3211030000
H 10.8978440000 -2.2340530000 1.7857090000
O 11.7774030000 -0.4338690000 2.3466810000
H 12.6805430000 -0.6051360000 2.0665640000
```

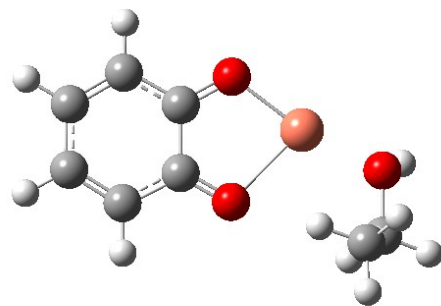

## Ethanol\_Ni

```
C 8.0068190000 0.0631230000 -1.6672620000
C 9.3610860000 0.0272860000 -1.9533600000
C 10.2229300000 0.9787170000 -1.4029640000
C 9.7461510000 1.9806900000 -0.5786080000
C 8.3812980000 2.0178740000 -0.2941060000
C 7.5226610000 1.0685740000 -0.8320210000
H 7.3492240000 -0.6854380000 -2.0990430000
H 10.4344570000 2.7133770000 -0.1671470000
H 7.9918230000 2.7967690000 0.3544540000
H 6.4619190000 1.1081290000 -0.6032780000
O 11.5350400000 0.8276640000 -1.7361040000
O 9.9532420000 -0.8842470000 -2.7550980000
Ni 11.6842450000 -0.5516930000 -2.8515460000
C 14.2089540000 -1.7083270000 -1.2547360000
H 14.8165300000 -1.7917240000 -0.3500140000
H 14.5329270000 -2.4804490000 -1.9585430000
H 13.1665360000 -1.8939040000 -0.9736270000
C 14.3630940000 -0.3385020000 -1.8455480000
H 13.9797240000 0.4377110000 -1.1753100000
H 15.4039400000 -0.1237580000 -2.1089940000
O 13.5886320000 -0.2846750000 -3.0780760000
H 13.6950840000 0.5921580000 -3.4661480000
```

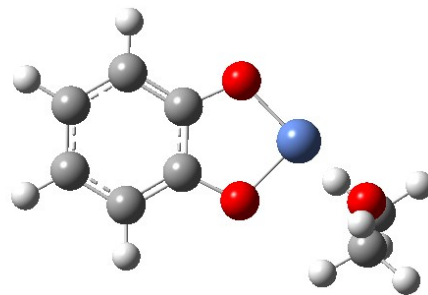

## H<sub>2</sub>O\_Li

```
C 6.7276710000 0.3316790000 -1.5572100000
C 8.1084150000 0.2563350000 -1.3483620000
C 8.8803860000 1.4145610000 -1.0936140000
C 8.1866270000 2.6446400000 -1.0106690000
C 6.8060570000 2.7178290000 -1.2188480000
C 6.0599530000 1.5600660000 -1.4745980000
H 6.1671650000 -0.5796650000 -1.7554140000
H 8.6197760000 -0.7031790000 -1.4061230000
H 8.7626030000 3.5467130000 -0.8135990000
H 6.3070130000 3.6825190000 -1.1537060000
H 4.9872040000 1.6178780000 -1.6359530000
O 10.1911880000 1.3539380000 -0.9094310000
Li 11.7526280000 0.6648900000 -1.0694800000
H 13.0337980000 2.4936980000 0.6352600000
H 11.6563390000 2.4513920000 -0.0879000000
O 12.5887310000 2.1707260000 -0.1484430000
```

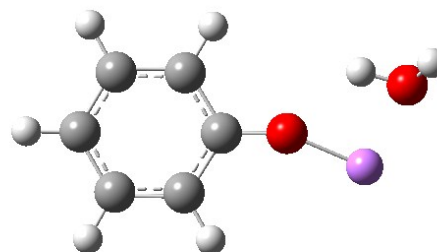

## H<sub>2</sub>O\_Mg

```
C 7.0826870000 0.3529050000 -1.3524490000
C 8.3904870000 0.7479110000 -1.0373200000
C 8.6877500000 2.1503270000 -0.9270970000
C 7.6789240000 3.0827530000 -1.2072160000
C 6.3782660000 2.6671690000 -1.5225000000
C 6.0872780000 1.3012280000 -1.6239650000
H 6.8798170000 -0.7133330000 -1.4233760000
H 7.9289770000 4.1380920000 -1.1247100000
H 5.6107700000 3.4088200000 -1.7300000000
H 5.0808290000 0.9711930000 -1.8695400000
O 9.9488760000 2.5554250000 -0.5957600000
O 9.3655020000 -0.1774920000 -0.7960560000
Mg 10.8507230000 0.9113780000 -0.3900650000
H 13.2845790000 -0.2608730000 0.2641990000
H 13.4713350000 1.2672550000 0.3440640000
O 12.8298180000 0.5780520000 0.1469910000
```

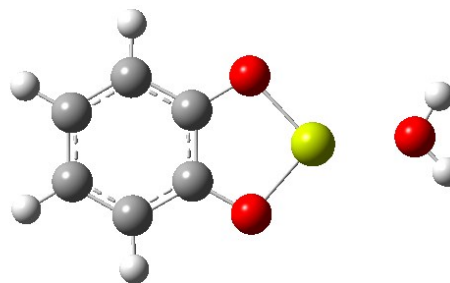

## H<sub>2</sub>O\_Zn

```
C 7.0995540000 0.3506190000 -1.4176290000
C 8.3914990000 0.7570550000 -1.0604730000
C 8.6766160000 2.1527320000 -0.9259710000
C 7.6745660000 3.0891800000 -1.2102920000
C 6.3883220000 2.6664710000 -1.5695100000
C 6.1080910000 1.2994530000 -1.6976160000
H 6.9042260000 -0.7152340000 -1.5069450000
H 7.9147820000 4.1444960000 -1.1065230000
H 5.6202190000 3.4049450000 -1.7845110000
H 5.1110050000 0.9686870000 -1.9768780000
O 9.9307010000 2.5544040000 -0.5538900000
O 9.3731460000 -0.1612010000 -0.8033090000
Zn 10.7958810000 0.9314550000 -0.3478000000
H 13.1249740000 -0.3743710000 0.0789710000
H 13.4301560000 1.1414640000 0.2198570000
O 12.7218980000 0.4954140000 0.1488200000
```

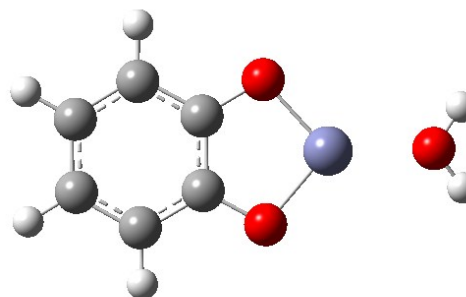

## H<sub>2</sub>O\_Cu

|    |               |               |               |
|----|---------------|---------------|---------------|
| C  | 7.4381840000  | 0.3622560000  | -1.2664050000 |
| C  | 8.8539060000  | 0.3718370000  | -1.3196680000 |
| C  | 9.5565010000  | 1.6770630000  | -1.3511200000 |
| C  | 8.7577840000  | 2.8599230000  | -1.3182700000 |
| C  | 7.3962590000  | 2.7891860000  | -1.2666270000 |
| C  | 6.7316050000  | 1.5334230000  | -1.2415470000 |
| H  | 6.9451350000  | -0.6050100000 | -1.2474150000 |
| H  | 9.2811210000  | 3.8112880000  | -1.3394730000 |
| H  | 6.8052610000  | 3.7002330000  | -1.2450850000 |
| H  | 5.6465750000  | 1.5091990000  | -1.2021720000 |
| O  | 10.8157030000 | 1.7016100000  | -1.4051150000 |
| O  | 9.5285270000  | -0.7134860000 | -1.3407930000 |
| Cu | 11.4014950000 | -0.4321650000 | -1.4385300000 |
| H  | 13.9414610000 | -0.4440070000 | -0.9159970000 |
| H  | 13.3875720000 | 0.8946660000  | -1.4802280000 |
| O  | 13.3321090000 | -0.0662410000 | -1.5557760000 |

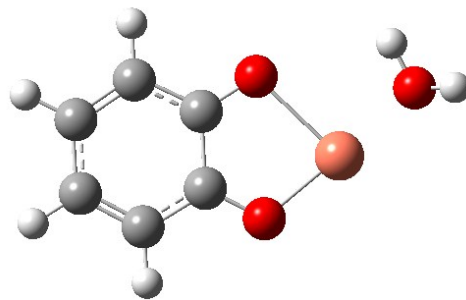

## H<sub>2</sub>O\_Ni

|    |               |               |               |
|----|---------------|---------------|---------------|
| C  | 7.3312800000  | 0.3799720000  | -1.2270710000 |
| C  | 8.5821050000  | 0.6806110000  | -0.7152550000 |
| C  | 8.9888890000  | 2.0099910000  | -0.5880360000 |
| C  | 8.1655590000  | 3.0503020000  | -0.9741620000 |
| C  | 6.9064830000  | 2.7461910000  | -1.4906810000 |
| C  | 6.4957510000  | 1.4258630000  | -1.6147380000 |
| H  | 7.0267060000  | -0.6581520000 | -1.3191890000 |
| H  | 8.5062320000  | 4.0760690000  | -0.8675920000 |
| H  | 6.2451030000  | 3.5515020000  | -1.7951520000 |
| H  | 5.5135230000  | 1.2015120000  | -2.0195250000 |
| O  | 10.2363260000 | 2.1816300000  | -0.0628070000 |
| O  | 9.4868700000  | -0.2396030000 | -0.3109990000 |
| Ni | 10.9358100000 | 0.5772150000  | 0.2659830000  |
| H  | 13.2615680000 | 1.5743680000  | 0.3771810000  |
| H  | 12.1289520000 | 2.3917290000  | 1.0417660000  |
| O  | 12.5080410000 | 1.5005780000  | 0.9726580000  |

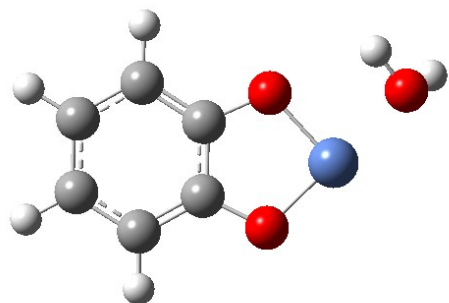

## Methanol\_Li

|    |               |               |               |
|----|---------------|---------------|---------------|
| C  | 7.9348890000  | 0.3094660000  | -2.0929930000 |
| C  | 9.1414790000  | 0.6392760000  | -2.7181110000 |
| C  | 9.8780010000  | 1.7899500000  | -2.3421770000 |
| C  | 9.3571710000  | 2.5661530000  | -1.2772450000 |
| C  | 8.1502130000  | 2.2330650000  | -0.6545770000 |
| C  | 7.4365180000  | 1.0913900000  | -1.0425160000 |
| H  | 7.3934670000  | -0.5788170000 | -2.4129830000 |
| H  | 9.5259460000  | 0.0306670000  | -3.5343300000 |
| H  | 9.9091430000  | 3.4539090000  | -0.9745100000 |
| H  | 7.7780380000  | 2.8567410000  | 0.1560350000  |
| H  | 6.4982240000  | 0.8345820000  | -0.5586280000 |
| O  | 11.0108090000 | 2.1068980000  | -2.9356200000 |
| Li | 12.4697000000 | 2.4811600000  | -3.6545150000 |
| C  | 14.0652210000 | 0.9740540000  | -1.8797370000 |
| H  | 13.0013470000 | 0.9236150000  | -1.6524710000 |
| H  | 14.6052470000 | 1.4036600000  | -1.0334590000 |
| H  | 14.4445400000 | -0.0253140000 | -2.1027830000 |
| O  | 14.1880160000 | 1.8272070000  | -3.0382940000 |
| H  | 15.1155710000 | 1.8967410000  | -3.2706520000 |

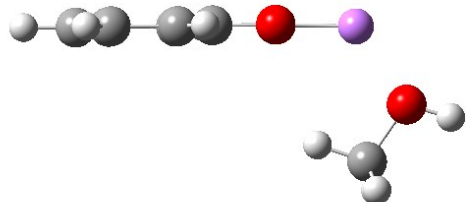

### Methanol\_Mg

```
C 6.9932800000 0.2691110000 -1.1111720000
C 8.2867160000 0.5626520000 -0.6565690000
C 8.8273130000 1.8735560000 -0.8934390000
C 8.0752220000 2.7956650000 -1.6346240000
C 6.7853370000 2.4812130000 -2.0836730000
C 6.2558260000 1.2068060000 -1.8467440000
H 6.6016040000 -0.7261150000 -0.9134210000
H 8.5075650000 3.7786520000 -1.8085890000
H 6.2185550000 3.2141770000 -2.6526310000
H 5.2564970000 0.9547050000 -2.1931010000
O 10.0737770000 2.1805430000 -0.4320720000
O 9.0128140000 -0.3610560000 0.0384690000
Mg 10.6043000000 0.5766290000 0.4245120000
C 13.0427910000 2.2229250000 0.9377530000
H 12.2892810000 2.7742590000 0.3757760000
H 13.9577880000 2.1243220000 0.3541250000
H 13.2382690000 2.7097640000 1.8930390000
O 12.4798280000 0.8978450000 1.1784880000
H 13.1070750000 0.3660500000 1.6739230000
```

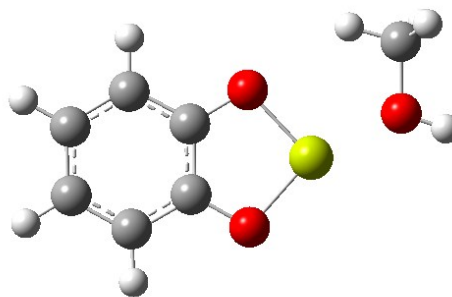

### Methanol\_Zn

```
C 8.0624240000 0.1213020000 -1.5539010000
C 9.3487060000 0.6768050000 -1.5587670000
C 9.5058700000 2.0746110000 -1.2953190000
C 8.3717840000 2.8714670000 -1.0971130000
C 7.0930450000 2.2995870000 -1.0980950000
C 6.9370200000 0.9304730000 -1.3519430000
H 7.9641170000 -0.9437330000 -1.7502210000
H 8.5173630000 3.9316990000 -0.9050500000
H 6.2218450000 2.9300040000 -0.9395780000
H 5.9459070000 0.4839540000 -1.3546380000
O 10.7603400000 2.6257700000 -1.2757210000
O 10.4552720000 -0.0926320000 -1.7743650000
Zn 11.8266670000 1.1636500000 -1.6228890000
C 13.7683690000 -1.0416690000 -2.2100420000
H 12.7558000000 -1.4414500000 -2.2061240000
H 14.3703770000 -1.5273860000 -1.4419370000
H 14.2188430000 -1.1625940000 -3.1953150000
O 13.6426710000 0.3723190000 -1.9044210000
H 14.5029890000 0.7992530000 -1.8915690000
```

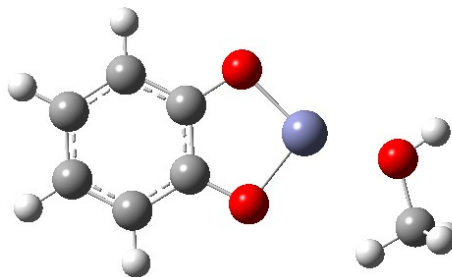

### Methanol\_Cu

```
C 0.0000000000 0.0000000000 0.0000000000
C 0.0000000000 0.0000000000 1.4173400000
C 1.2983010000 0.0000000000 2.1297420000
C 2.4885700000 0.0010750000 1.3417940000
C 2.4273430000 -0.0002560000 -0.0216640000
C 1.1772920000 -0.0008290000 -0.6966790000
H -0.9629620000 0.0000170000 -0.5017790000
H 3.4358540000 0.0011690000 1.8728860000
H 3.3429050000 -0.0011320000 -0.6061500000
H 1.1626160000 -0.0016860000 -1.7827250000
O 1.3056450000 -0.0005920000 3.3901570000
O -1.0831800000 0.0002710000 2.0915650000
Cu -0.8092380000 -0.0233340000 3.9790060000
C 0.4836700000 0.2598500000 6.5395960000
H 1.2589120000 -0.1138200000 5.8709930000
H 0.5613860000 -0.2244430000 7.5165690000
H 0.5952970000 1.3430810000 6.6407210000
O -0.7729350000 -0.0690670000 5.9292940000
H -1.5075850000 0.2692890000 6.4460030000
```

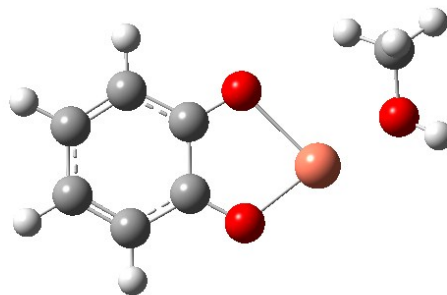

### Methanol\_Ni

```
C 7.6024060000 0.1649070000 -1.0629370000
C 8.9848960000 0.1136730000 -1.1186260000
C 9.7201890000 1.2606180000 -1.4251210000
C 9.0919160000 2.4674750000 -1.6686030000
C 7.6995890000 2.5184480000 -1.6095040000
C 6.9646030000 1.3789940000 -1.3109780000
H 7.0432600000 -0.7354150000 -0.8263610000
H 9.6854040000 3.3472780000 -1.8998120000
H 7.1909100000 3.4588730000 -1.7987460000
H 5.8809190000 1.4310660000 -1.2680150000
O 11.0715770000 1.0858110000 -1.4646950000
O 9.7214640000 -0.9960790000 -0.8900740000
Ni 11.4331690000 -0.6095100000 -1.0590300000
C 13.8057230000 -0.0683740000 -2.5396940000
H 13.6629860000 -1.0130410000 -3.0635880000
H 14.8693420000 0.1790100000 -2.5218420000
H 13.2260640000 0.7189600000 -3.0274720000
O 13.3363190000 -0.2641420000 -1.1917870000
H 13.4436420000 0.5654420000 -0.7086680000
```

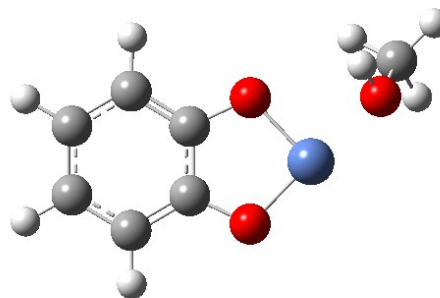

## Hydrogen onto metal alkoxide/solvent complex

### H<sub>2</sub>\_CHCl<sub>3</sub>\_Li

```
C 7.5590990000 0.1132340000 -1.7147980000
C 8.9041140000 0.0946280000 -1.3332540000
C 9.5697670000 1.2791020000 -0.9425430000
C 8.8125680000 2.4733630000 -0.9124710000
C 7.4668210000 2.4873420000 -1.2936450000
C 6.8236720000 1.3052830000 -1.6814820000
H 7.0764200000 -0.8146950000 -2.0142440000
H 9.4722360000 -0.8331400000 -1.3515200000
H 9.3130230000 3.3941880000 -0.6181350000
H 6.9133950000 3.4235620000 -1.2647780000
H 5.7783350000 1.3171190000 -1.9768730000
O 10.8450150000 1.2691960000 -0.5760090000
Li 12.5042420000 1.1477630000 -0.4313210000
C 11.2796400000 2.1439240000 2.3118710000
H 10.7410890000 1.9041880000 1.3945890000
Cl 10.7468540000 1.0909770000 3.6089790000
Cl 13.0148020000 1.8207190000 1.9258650000
Cl 11.0591710000 3.8408880000 2.7011880000
H 14.3032690000 0.7975210000 -1.5769600000
H 13.7669270000 0.7581940000 -2.0889390000
```

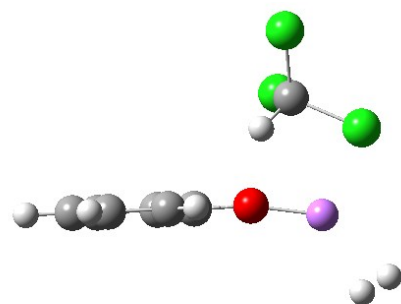

### H<sub>2</sub>\_DMF\_Li

```
C -0.0326960000 0.9079970000 2.1905610000
C 0.3910700000 -0.3370890000 2.6748290000
C 1.7354550000 -0.5617000000 3.0791880000
C 2.6292840000 0.5363080000 2.9322910000
C 2.2117600000 1.7657300000 2.4318960000
C 0.8665360000 1.9801740000 2.0943670000
H -1.0810710000 1.0481400000 1.9108000000
H -0.3054630000 -1.1705980000 2.7455670000
H 3.6599540000 0.3933600000 3.2118530000
H 2.9319930000 2.5773160000 2.3362800000
H 0.5380950000 2.9479050000 1.7105360000
O 2.1096490000 -1.7022740000 3.6208260000
Li 2.1134430000 -1.9039470000 5.3637650000
N 1.1493800000 1.6552490000 6.9649050000
C 0.7848940000 2.9287680000 6.3562870000
H 0.7044190000 2.8035220000 5.2730520000
H -0.1755410000 3.2762280000 6.7553720000
H 1.5551530000 3.6741040000 6.5745920000
C 1.3668580000 1.6258160000 8.4060970000
H 0.4719710000 2.0030110000 8.9146930000
H 1.5614560000 0.5965420000 8.7045470000
H 2.2256620000 2.2538720000 8.6709880000
C 1.3204760000 0.5583970000 6.2130140000
H 1.1242150000 0.7239730000 5.1415350000
O 1.6725590000 -0.5509850000 6.6627760000
H 2.5926560000 -3.9261150000 5.0609530000
H 2.5876630000 -3.9932590000 5.8008020000
```

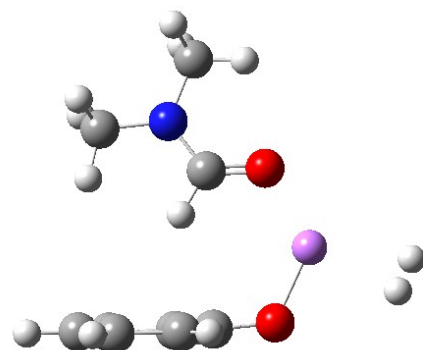

## H<sub>2</sub>Ethanol\_Li

|    |               |               |               |
|----|---------------|---------------|---------------|
| C  | 7.5603900000  | -0.0078690000 | -2.4948060000 |
| C  | 8.8364310000  | 0.1209290000  | -1.9382900000 |
| C  | 9.1464310000  | 1.1661850000  | -1.0321690000 |
| C  | 8.0912650000  | 2.0484300000  | -0.6871280000 |
| C  | 6.8159350000  | 1.9160330000  | -1.2460560000 |
| C  | 6.5317130000  | 0.8754510000  | -2.1399280000 |
| H  | 7.3621780000  | -0.8194350000 | -3.1924960000 |
| H  | 9.6335700000  | -0.5658000000 | -2.2162270000 |
| H  | 8.3100620000  | 2.8625000000  | 0.0017590000  |
| H  | 6.0334200000  | 2.6173680000  | -0.9622540000 |
| H  | 5.5411610000  | 0.7746530000  | -2.5748380000 |
| O  | 10.3504030000 | 1.2976970000  | -0.5168370000 |
| Li | 11.6996530000 | 1.3580150000  | 0.4813570000  |
| C  | 9.9293820000  | 0.5733780000  | 2.9071520000  |
| H  | 9.1896880000  | 0.0039300000  | 3.4764440000  |
| H  | 9.5971570000  | 0.6262160000  | 1.8665670000  |
| H  | 9.9793080000  | 1.5844420000  | 3.3185870000  |
| C  | 11.2755020000 | -0.1097500000 | 3.0125600000  |
| H  | 11.6233120000 | -0.1307600000 | 4.0496120000  |
| H  | 11.2274260000 | -1.1341060000 | 2.6314440000  |
| O  | 12.2367790000 | 0.6381620000  | 2.2207290000  |
| H  | 13.1175410000 | 0.3939340000  | 2.5150650000  |
| H  | 12.8356390000 | 2.4663110000  | -0.9349360000 |
| H  | 13.4047350000 | 2.4788220000  | -0.4574780000 |

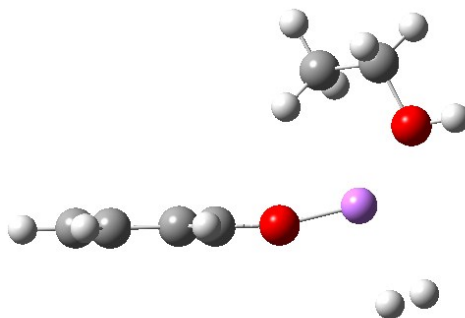

## H<sub>2</sub>H<sub>2</sub>O\_Li

|    |               |               |               |
|----|---------------|---------------|---------------|
| C  | 7.4203860000  | 0.4787350000  | -1.8213580000 |
| C  | 8.7886310000  | 0.6118700000  | -1.5632830000 |
| C  | 9.2936390000  | 1.6874220000  | -0.7940340000 |
| C  | 8.3481340000  | 2.5886560000  | -0.2500520000 |
| C  | 6.9808730000  | 2.4529990000  | -0.5082760000 |
| C  | 6.5013740000  | 1.3859580000  | -1.2794010000 |
| H  | 7.0688730000  | -0.3586630000 | -2.4207770000 |
| H  | 9.4964990000  | -0.1061020000 | -1.9747300000 |
| H  | 8.7172400000  | 3.4189970000  | 0.3486150000  |
| H  | 6.2833030000  | 3.1694490000  | -0.0792370000 |
| H  | 5.4385400000  | 1.2812460000  | -1.4784490000 |
| O  | 10.5903460000 | 1.8293890000  | -0.5616830000 |
| Li | 12.2411850000 | 1.7494000000  | -1.0491380000 |
| H  | 13.2400440000 | 2.3390560000  | 1.5021020000  |
| H  | 11.8524810000 | 2.4764720000  | 0.8137100000  |
| O  | 12.8162270000 | 2.5144530000  | 0.6616300000  |
| H  | 12.9126450000 | 1.5780720000  | -3.1244950000 |
| H  | 12.1703510000 | 1.5808110000  | -3.1529330000 |

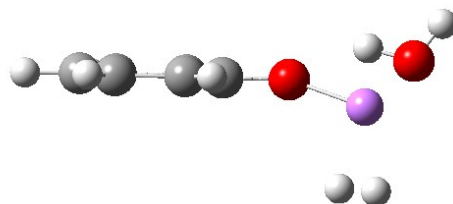

## H<sub>2</sub>\_Methanol\_Li

```
C 8.2347880000 0.5867860000 -1.9940230000
C 9.4278710000 1.0110900000 -2.5873640000
C 10.1496810000 2.1229410000 -2.0848760000
C 9.6285320000 2.7552730000 -0.9280890000
C 8.4351730000 2.3278340000 -0.3377170000
C 7.7363740000 1.2274800000 -0.8519130000
H 7.7047440000 -0.2666800000 -2.4127420000
H 9.8113860000 0.5125870000 -3.4756530000
H 10.1684560000 3.6109480000 -0.5270450000
H 8.0626660000 2.8429410000 0.5457820000
H 6.8085560000 0.8975070000 -0.3928320000
O 11.2665550000 2.5313900000 -2.6495040000
Li 12.7749320000 2.9278390000 -3.2652360000
C 14.1522480000 1.0642910000 -1.6436110000
H 13.0751310000 1.0611240000 -1.4833110000
H 14.6644750000 1.3290200000 -0.7161810000
H 14.4789530000 0.0809840000 -1.9885250000
O 14.4040650000 2.0607450000 -2.6577990000
H 15.3472050000 2.0928010000 -2.8270210000
H 12.1557830000 4.4117000000 -4.6507390000
H 12.8686320000 4.4976080000 -4.8407670000
```

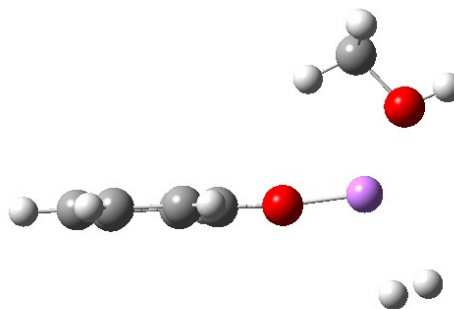

## H<sub>2</sub>\_CHCl<sub>3</sub>\_Mg

```
C 7.0950300000 0.5038200000 -0.8043870000
C 8.3361830000 0.5928310000 -0.1589080000
C 9.0403470000 1.8414880000 -0.1818390000
C 8.5101660000 2.9199350000 -0.8999990000
C 7.2691190000 2.8095840000 -1.5418250000
C 6.5756000000 1.5932380000 -1.5162870000
H 6.5714250000 -0.4486970000 -0.7706080000
H 9.0667320000 3.8545120000 -0.9084780000
H 6.8692910000 3.6576600000 -2.0918000000
H 5.6134190000 1.5015690000 -2.0138730000
O 10.2394090000 1.9318630000 0.4696510000
O 8.8662590000 -0.4625350000 0.5187710000
Mg 10.4884220000 0.2010890000 1.2169130000
C 12.7770780000 2.6023530000 1.7138830000
H 11.8576260000 2.7311970000 1.1358330000
Cl 12.7799990000 3.6528470000 3.1070540000
Cl 12.7173200000 0.8482560000 2.2878660000
Cl 14.1782270000 2.8165310000 0.6963460000
H 10.9845230000 -1.8436610000 2.2009800000
H 10.3264410000 -1.9418060000 1.8586240000
```

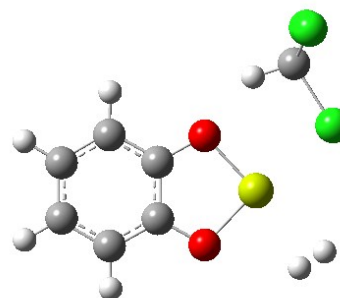



## H<sub>2</sub>\_DMF\_Mg

|    |               |               |               |
|----|---------------|---------------|---------------|
| C  | -0.0193520000 | 0.3107050000  | 0.2370840000  |
| C  | -0.0610270000 | 0.2504850000  | 1.6368860000  |
| C  | 1.1391400000  | -0.0656640000 | 2.3610470000  |
| C  | 2.3001430000  | -0.3828190000 | 1.6403570000  |
| C  | 2.3218900000  | -0.3207630000 | 0.2394070000  |
| C  | 1.1540630000  | -0.0033940000 | -0.4645320000 |
| H  | -0.9377290000 | 0.5630030000  | -0.2895310000 |
| H  | 3.1960410000  | -0.6295270000 | 2.2061060000  |
| H  | 3.2359950000  | -0.5645250000 | -0.2969540000 |
| H  | 1.1638620000  | 0.0464700000  | -1.5508290000 |
| O  | 1.1119760000  | -0.0887330000 | 3.7172190000  |
| O  | -1.1973340000 | 0.5224950000  | 2.3342640000  |
| Mg | -0.6929930000 | 0.3114950000  | 4.1686520000  |
| N  | -4.4529650000 | 0.1679420000  | 4.6788790000  |
| C  | -5.8491060000 | -0.0445610000 | 5.0506970000  |
| H  | -5.9079850000 | -0.4218320000 | 6.0725630000  |
| H  | -6.3923100000 | 0.9017110000  | 4.9840950000  |
| H  | -6.3031730000 | -0.7690770000 | 4.3706980000  |
| C  | -4.2035140000 | 0.7478130000  | 3.3534670000  |
| H  | -4.3133310000 | 1.8351920000  | 3.4027800000  |
| H  | -3.2087660000 | 0.4951710000  | 2.9789630000  |
| H  | -4.9514210000 | 0.3430850000  | 2.6696210000  |
| C  | -3.4859190000 | -0.0592010000 | 5.5573110000  |
| H  | -3.8301570000 | -0.4667120000 | 6.5146310000  |
| O  | -2.2651680000 | 0.1507500000  | 5.3830540000  |
| H  | -0.0773350000 | 1.8661910000  | 5.9069670000  |
| H  | 0.5550270000  | 1.7334360000  | 5.5346440000  |

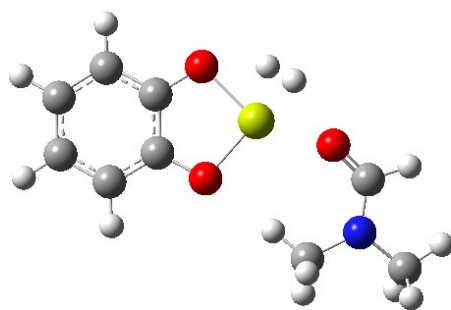

## H<sub>2</sub>\_Ethanol\_Mg

|    |               |               |               |
|----|---------------|---------------|---------------|
| C  | 8.0181840000  | 0.5235660000  | -0.7763180000 |
| C  | 9.1317470000  | 1.2975360000  | -0.4227200000 |
| C  | 9.0000830000  | 2.7273630000  | -0.3736560000 |
| C  | 7.7811890000  | 3.3109260000  | -0.7471800000 |
| C  | 6.6802670000  | 2.5196560000  | -1.1032180000 |
| C  | 6.8074000000  | 1.1259130000  | -1.1457890000 |
| H  | 8.1389520000  | -0.5574120000 | -0.8005070000 |
| H  | 7.7062970000  | 4.3955000000  | -0.7089470000 |
| H  | 5.7438000000  | 2.9941910000  | -1.3863610000 |
| H  | 5.9582930000  | 0.5055450000  | -1.4223330000 |
| O  | 10.0704450000 | 3.4874220000  | -0.0107200000 |
| O  | 10.3184740000 | 0.7220390000  | -0.0783550000 |
| Mg | 11.4069170000 | 2.2051180000  | 0.3945320000  |
| C  | 13.1405980000 | -0.5922290000 | 0.9710470000  |
| H  | 13.3142560000 | -1.6037560000 | 1.3485490000  |
| H  | 13.8971720000 | -0.3759240000 | 0.2128300000  |
| H  | 12.1423110000 | -0.5642090000 | 0.5225340000  |
| C  | 13.2487900000 | 0.3783300000  | 2.1240310000  |
| H  | 12.5084630000 | 0.1681900000  | 2.8987900000  |
| H  | 14.2493450000 | 0.3739880000  | 2.5618780000  |
| O  | 13.0025550000 | 1.7374490000  | 1.6219420000  |
| H  | 13.4395630000 | 2.3658800000  | 2.2039890000  |
| H  | 13.0955020000 | 3.7865590000  | -0.4200230000 |
| H  | 12.4295650000 | 4.0875750000  | -0.5735220000 |

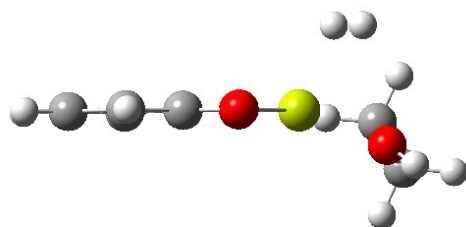

## H<sub>2</sub>\_H<sub>2</sub>O\_Mg

```
C 6.8787860000 0.5805300000 -0.5680520000
C 8.2355980000 0.7855680000 -0.2826090000
C 8.8891540000 1.9536100000 -0.8046770000
C 8.1723740000 2.8206010000 -1.6402140000
C 6.8165510000 2.5958810000 -1.9172290000
C 6.1776120000 1.4605380000 -1.4040950000
H 6.4016630000 -0.3063250000 -0.1570740000
H 8.6884740000 3.6954610000 -2.0297090000
H 6.2774840000 3.2828020000 -2.5650510000
H 5.1267870000 1.2798180000 -1.6167200000
O 10.2003930000 2.1621960000 -0.5040030000
O 8.9334990000 -0.0751670000 0.5114960000
Mg 10.6641870000 0.6787730000 0.5986030000
H 13.5093780000 1.5144850000 0.7548670000
H 12.3528120000 2.2417310000 -0.0139580000
O 12.5709090000 1.4920970000 0.5642700000
H 11.4459080000 -0.9479860000 2.0495620000
H 10.7282090000 -1.1229960000 1.9345100000
```

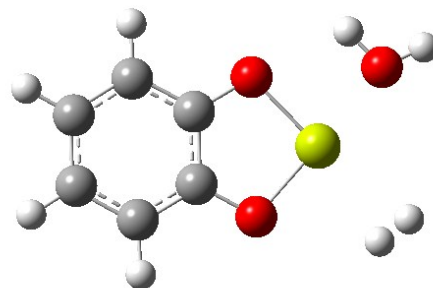

## H<sub>2</sub>\_Methanol\_Mg

```
C 6.8220720000 0.6279890000 -0.3777910000
C 8.1513060000 0.8622230000 0.0006210000
C 8.9040390000 1.8767840000 -0.6831340000
C 8.3119760000 2.5546730000 -1.7580140000
C 6.9821220000 2.3039440000 -2.1241550000
C 6.2464660000 1.3196660000 -1.4526670000
H 6.2687960000 -0.1393230000 0.1592050000
H 8.9018040000 3.3136310000 -2.2675980000
H 6.5411610000 2.8448220000 -2.9580070000
H 5.2151150000 1.1193070000 -1.7326920000
O 10.1863900000 2.1249740000 -0.2995470000
O 8.7305590000 0.1807500000 1.0277280000
Mg 10.4748720000 0.9122120000 1.1373370000
C 13.0909770000 2.3838920000 0.9116140000
H 12.3691980000 2.7313300000 0.1732400000
H 13.9678350000 1.9598920000 0.4221990000
H 13.3733780000 3.1941000000 1.5839280000
O 12.4144080000 1.3397170000 1.6747140000
H 13.0113260000 0.9976420000 2.3441080000
H 10.7767710000 -0.6822580000 2.9884080000
H 10.0818670000 -0.7710060000 2.7295750000
```

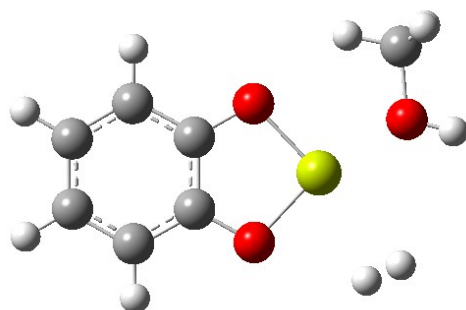

## H<sub>2</sub>\_CHCl<sub>3</sub>\_Zn

```
C 8.2368530000 0.0010310000 -1.9884470000
C 8.9676710000 -0.0881790000 -0.7980210000
C 8.9853470000 1.0234450000 0.0995940000
C 8.3182340000 2.2029650000 -0.2503330000
C 7.5926730000 2.2781250000 -1.4456130000
C 7.5722950000 1.1868080000 -2.3243530000
H 8.2323600000 -0.8585430000 -2.6538790000
H 8.3495370000 3.0383330000 0.4449170000
H 7.0762240000 3.1987110000 -1.7041280000
H 7.0113830000 1.2431500000 -3.2534530000
O 9.6869040000 0.9198610000 1.2712360000
O 9.6363350000 -1.2400390000 -0.4706450000
Zn 10.3664420000 -0.8201970000 1.1606440000
C 11.2108020000 0.6751360000 3.8359140000
H 10.5817040000 1.1245990000 3.0660410000
Cl 10.3337120000 0.5478670000 5.3376760000
Cl 11.5792920000 -1.0231340000 3.2105570000
Cl 12.7053600000 1.5603180000 3.9886060000
H 10.9364750000 -3.3507010000 0.2661340000
H 11.3543850000 -3.5891580000 0.8315750000
```

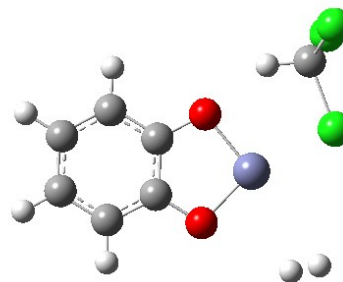

## H<sub>2</sub>\_DMF\_Zn

```
C 0.0148850000 0.4435050000 -0.0000280000
C -0.0095470000 0.3795250000 1.3987200000
C 1.1751400000 0.0002350000 2.1084480000
C 2.3165230000 -0.3644550000 1.3811590000
C 2.3256870000 -0.2979690000 -0.0186830000
C 1.1670160000 0.0791730000 -0.7099110000
H -0.8954340000 0.7417820000 -0.5148580000
H 3.2053490000 -0.6570720000 1.9360340000
H 3.2218590000 -0.5807470000 -0.5655520000
H 1.1689590000 0.1305430000 -1.7958340000
O 1.1465650000 -0.0341240000 3.4673400000
O -1.1380860000 0.7125820000 2.0945960000
Zn -0.6331360000 0.4922590000 3.8525230000
N 0.4359330000 0.2438380000 7.7135680000
C 1.7126990000 -0.1130790000 8.3227700000
H 2.4399880000 -0.3345410000 7.5409950000
H 2.0759200000 0.7200330000 8.9301380000
H 1.5834840000 -0.9936230000 8.9572700000
C -0.6675610000 0.5769880000 8.6082570000
H -0.3866180000 1.4348650000 9.2247130000
H -1.5450420000 0.8196440000 8.0119560000
H -0.8805400000 -0.2789210000 9.2537690000
C 0.2958970000 0.2639070000 6.3950380000
H 1.1849240000 -0.0000420000 5.8099860000
O -0.7872040000 0.5668720000 5.8216380000
H -1.1358450000 -2.6155920000 4.2739000000
H -1.8502960000 -2.4232110000 4.2765920000
```

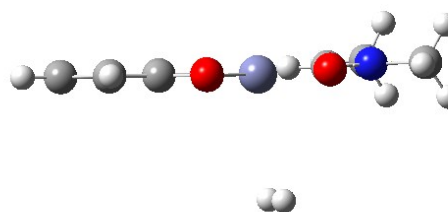

## H<sub>2</sub>\_ Ethanol\_Zn

|    |               |               |               |
|----|---------------|---------------|---------------|
| C  | 7.5556630000  | 0.8800590000  | 0.1868550000  |
| C  | 8.8235100000  | 1.4687760000  | 0.2750260000  |
| C  | 9.0154250000  | 2.7962260000  | -0.2225890000 |
| C  | 7.9500910000  | 3.4589310000  | -0.8448380000 |
| C  | 6.6886130000  | 2.8552660000  | -0.9269010000 |
| C  | 6.4985770000  | 1.5569730000  | -0.4351700000 |
| H  | 7.4297050000  | -0.1272850000 | 0.5767920000  |
| H  | 8.1211660000  | 4.4642890000  | -1.2221690000 |
| H  | 5.8699970000  | 3.3833070000  | -1.4092660000 |
| H  | 5.5212210000  | 1.0854070000  | -0.4989550000 |
| O  | 10.2463180000 | 3.3814840000  | -0.1154090000 |
| O  | 9.8714590000  | 0.8151410000  | 0.8579480000  |
| Zn | 11.2429710000 | 2.0634130000  | 0.7246360000  |
| C  | 12.9368640000 | -0.4446250000 | 1.9188450000  |
| H  | 13.2409120000 | -1.2300880000 | 2.6159520000  |
| H  | 13.2881690000 | -0.7132400000 | 0.9203260000  |
| H  | 11.8433150000 | -0.3984180000 | 1.9142940000  |
| C  | 13.5439370000 | 0.8653910000  | 2.3636410000  |
| H  | 13.2207770000 | 1.1415760000  | 3.3702060000  |
| H  | 14.6349600000 | 0.8379180000  | 2.3221010000  |
| O  | 13.1024230000 | 1.9094700000  | 1.4390780000  |
| H  | 13.6441080000 | 2.6994770000  | 1.5360200000  |
| H  | 12.2776890000 | 4.8053410000  | 0.0976340000  |
| H  | 12.9867940000 | 4.9597050000  | 0.2554910000  |

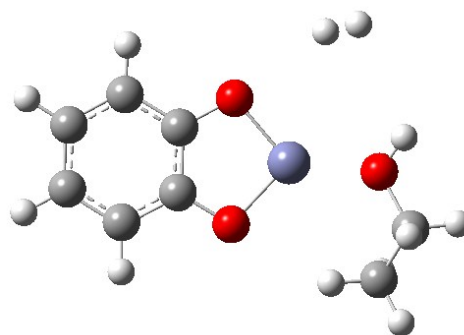

## H<sub>2</sub>\_ H<sub>2</sub>O\_Zn

|    |               |               |               |
|----|---------------|---------------|---------------|
| C  | 7.4884770000  | 0.6374920000  | -1.7520130000 |
| C  | 8.6432570000  | 1.0183720000  | -1.0569350000 |
| C  | 8.6591490000  | 2.2654190000  | -0.3563730000 |
| C  | 7.5440170000  | 3.1094130000  | -0.4259370000 |
| C  | 6.3983480000  | 2.7149420000  | -1.1284880000 |
| C  | 6.3800430000  | 1.4916490000  | -1.8116320000 |
| H  | 7.4946030000  | -0.3174040000 | -2.2720460000 |
| H  | 7.5819940000  | 4.0544990000  | 0.1101730000  |
| H  | 5.5388570000  | 3.3789200000  | -1.1714260000 |
| H  | 5.4925090000  | 1.1834810000  | -2.3582740000 |
| O  | 9.7758940000  | 2.6363010000  | 0.3457480000  |
| O  | 9.7412510000  | 0.2053160000  | -1.0062380000 |
| Zn | 10.8929230000 | 1.1959230000  | 0.0672620000  |
| H  | 13.0128470000 | -0.3088800000 | -0.0631490000 |
| H  | 13.5519480000 | 0.9534590000  | 0.6718860000  |
| O  | 12.7539550000 | 0.4734400000  | 0.4354440000  |
| H  | 11.4480150000 | -1.5572940000 | -1.3693040000 |
| H  | 12.0714640000 | -1.9604480000 | -1.3270870000 |

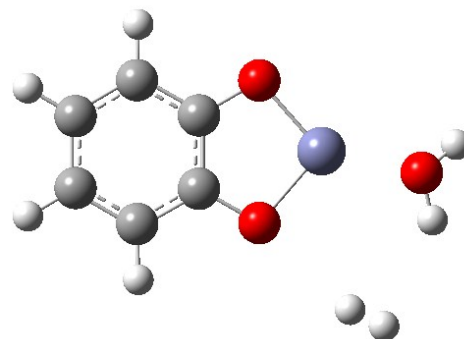

## H<sub>2</sub>\_Methanol\_Zn

|    |               |               |               |
|----|---------------|---------------|---------------|
| C  | 8.0858340000  | 0.2689170000  | -1.7926070000 |
| C  | 9.3832580000  | 0.7218770000  | -1.5205910000 |
| C  | 9.5608680000  | 2.0053180000  | -0.9136120000 |
| C  | 8.4432410000  | 2.8087860000  | -0.6577130000 |
| C  | 7.1530880000  | 2.3409340000  | -0.9384910000 |
| C  | 6.9766000000  | 1.0827730000  | -1.5293590000 |
| H  | 7.9710930000  | -0.7117200000 | -2.2484040000 |
| H  | 8.6048040000  | 3.7825710000  | -0.2016610000 |
| H  | 6.2942010000  | 2.9742040000  | -0.7316570000 |
| H  | 5.9768680000  | 0.7172170000  | -1.7498140000 |
| O  | 10.8250900000 | 2.4455140000  | -0.6242170000 |
| O  | 10.4761820000 | -0.0504860000 | -1.7897780000 |
| Zn | 11.8695190000 | 1.0325120000  | -1.1927460000 |
| C  | 13.9826850000 | -0.9862370000 | -1.9671090000 |
| H  | 13.0095880000 | -1.4009250000 | -2.2234120000 |
| H  | 14.4815680000 | -1.6217950000 | -1.2352560000 |
| H  | 14.5907400000 | -0.8713120000 | -2.8646130000 |
| O  | 13.7252820000 | 0.3163780000  | -1.3841250000 |
| H  | 14.5445810000 | 0.7495400000  | -1.1308020000 |
| H  | 13.7757400000 | 3.4118590000  | 0.0260270000  |
| H  | 13.0351540000 | 3.4439230000  | -0.0130600000 |

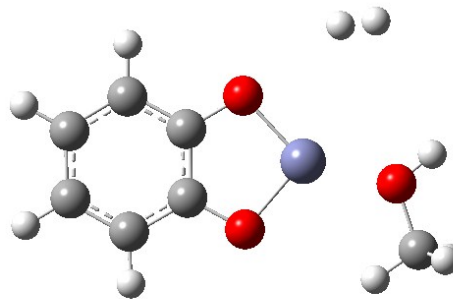

## H<sub>2</sub>\_CHCl<sub>3</sub>\_Cu

|    |               |               |               |
|----|---------------|---------------|---------------|
| C  | 6.8077860000  | 0.3698410000  | -1.9458300000 |
| C  | 7.8685250000  | 0.1059190000  | -1.0409730000 |
| C  | 8.4177980000  | 1.2264610000  | -0.2460660000 |
| C  | 7.8563780000  | 2.5193960000  | -0.4310360000 |
| C  | 6.8346440000  | 2.7139460000  | -1.3159220000 |
| C  | 6.3074180000  | 1.6344320000  | -2.0765800000 |
| H  | 6.4173890000  | -0.4654360000 | -2.5187650000 |
| H  | 8.2680970000  | 3.3342990000  | 0.1565320000  |
| H  | 6.4128480000  | 3.7061440000  | -1.4466610000 |
| H  | 5.4944580000  | 1.8255420000  | -2.7706440000 |
| O  | 9.3639610000  | 0.9904490000  | 0.5634920000  |
| O  | 8.3584330000  | -1.0608660000 | -0.8948600000 |
| Cu | 9.7665530000  | -1.1131980000 | 0.4198580000  |
| C  | 11.3297130000 | 0.1349050000  | 2.6902900000  |
| H  | 10.9465600000 | 0.8145900000  | 1.9277150000  |
| Cl | 10.2007700000 | 0.0789600000  | 4.0279110000  |
| Cl | 11.4004760000 | -1.5222660000 | 1.8648620000  |
| Cl | 12.9480770000 | 0.5928500000  | 3.1829530000  |
| H  | 11.6462540000 | 0.9668540000  | -0.3892640000 |
| H  | 12.3810110000 | 0.8551310000  | -0.4989190000 |

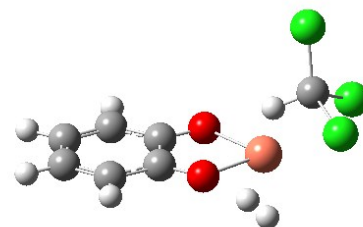

## H<sub>2</sub>\_DMF\_Cu

```
C -0.2318150000 1.0303660000 0.3867270000
C -0.0185250000 1.1097710000 1.7900300000
C 0.7358740000 0.0237370000 2.4504620000
C 1.2221460000 -1.0469830000 1.6489090000
C 0.9921970000 -1.0651230000 0.3015580000
C 0.2620650000 -0.0238150000 -0.3316740000
H -0.7853160000 1.8372980000 -0.0845590000
H 1.7789110000 -1.8350270000 2.1471970000
H 1.3714350000 -1.8850900000 -0.3015530000
H 0.1004420000 -0.0707540000 -1.4048490000
O 0.9088590000 0.0855490000 3.7030360000
O -0.4604480000 2.0575090000 2.5077860000
Cu 0.0541370000 1.7675440000 4.4613490000
N -3.6892260000 -0.3000760000 4.5111990000
C -4.3840260000 -0.9910240000 3.4506880000
H -3.8433990000 -0.8663520000 2.5099690000
H -4.4593670000 -2.0620330000 3.6720150000
H -5.3974870000 -0.5913470000 3.3287810000
C -4.2712740000 -0.3599050000 5.8339180000
H -4.3347550000 -1.3994510000 6.1750360000
H -3.6453840000 0.2086770000 6.5213110000
H -5.2810390000 0.0656470000 5.8231230000
C -2.5419600000 0.3622400000 4.2874290000
H -2.2181470000 0.3238180000 3.2314860000
O -1.9022160000 0.9609890000 5.1401090000
H 0.6038070000 2.4029230000 5.8614050000
H 0.1985460000 3.0197470000 5.5019200000
```

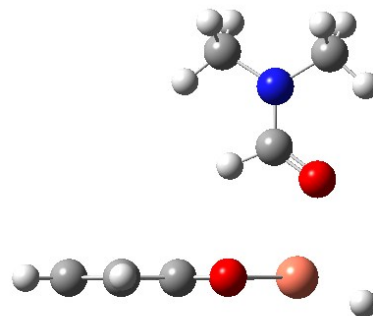

## H<sub>2</sub>\_Ethanol\_Cu

```
C 8.3895090000 0.9362940000 0.0630160000
C 9.6677890000 0.4439830000 -0.3056590000
C 10.2215010000 0.8209740000 -1.6252640000
C 9.4348060000 1.6665620000 -2.4618110000
C 8.2100940000 2.1113130000 -2.0533460000
C 7.6840560000 1.7447250000 -0.7854070000
H 8.0006700000 0.6466590000 1.0346390000
H 9.8495120000 1.9367160000 -3.4285070000
H 7.6227490000 2.7548220000 -2.7021030000
H 6.7063100000 2.1155500000 -0.4916750000
O 11.3576120000 0.3831380000 -1.9557090000
O 10.3510970000 -0.3099370000 0.4600050000
Cu 12.0782810000 -0.7849110000 -0.2631440000
C 14.6455290000 0.0269230000 -2.0826930000
H 15.1396090000 0.1693940000 -3.0479100000
H 15.2619200000 0.4932680000 -1.3081530000
H 13.6720660000 0.5267100000 -2.1236340000
C 14.4758250000 -1.4400650000 -1.8137970000
H 13.8384380000 -1.9112800000 -2.5719280000
H 15.4403970000 -1.9603000000 -1.7878840000
O 13.8541870000 -1.5963350000 -0.5157970000
H 13.9273000000 -2.5069330000 -0.2183790000
H 13.3480400000 1.3429080000 0.5124960000
H 12.6761100000 1.6668000000 0.5971690000
```

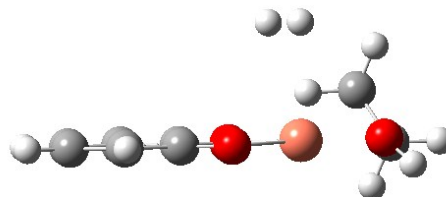

## H<sub>2</sub>\_H<sub>2</sub>O\_Cu

```
C 7.4551150000 0.3203250000 -1.0618890000
C 8.8719220000 0.3176460000 -1.0932830000
C 9.5852130000 1.6168380000 -1.1402370000
C 8.7950750000 2.8060760000 -1.1414110000
C 7.4324140000 2.7468510000 -1.1083890000
C 6.7574530000 1.4970020000 -1.0694060000
H 6.9543410000 -0.6427580000 -1.0325940000
H 9.3262690000 3.7527630000 -1.1743460000
H 6.8484960000 3.6627110000 -1.1128490000
H 5.6717940000 1.4819780000 -1.0455400000
O 10.8451400000 1.6315670000 -1.1770940000
O 9.5378180000 -0.7729340000 -1.0824630000
Cu 11.4223160000 -0.5023480000 -1.1013800000
H 13.9387900000 -0.5135410000 -0.4457050000
H 13.4297270000 0.8083430000 -1.0872040000
O 13.3673830000 -0.1539890000 -1.1294040000
H 11.5552380000 0.0759160000 1.6626560000
H 10.8276850000 -0.0470020000 1.5292570000
```

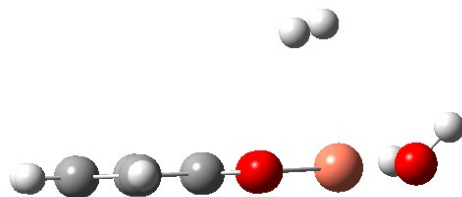

## H<sub>2</sub>\_Methanol\_Cu

```
C 0.0472410000 -0.0228320000 0.0785550000
C 1.4635240000 -0.0204660000 0.0224010000
C 2.1718800000 1.2795900000 -0.0135480000
C 1.3822550000 2.4680590000 0.0190600000
C 0.0200700000 2.4047530000 0.0744080000
C -0.6519070000 1.1529850000 0.1032770000
H -0.4518430000 -0.9870270000 0.0997010000
H 1.9111100000 3.4163350000 -0.0059690000
H -0.5657720000 3.3191880000 0.0962020000
H -1.7370280000 1.1359170000 0.1453770000
O 3.4309510000 1.2909020000 -0.0695850000
O 2.1392050000 -1.1027560000 0.0011480000
Cu 4.0306300000 -0.8282260000 -0.0504560000
C 6.5796970000 0.4628180000 0.3088420000
H 5.9194110000 1.2514140000 -0.0519560000
H 7.5719130000 0.5665970000 -0.1382000000
H 6.6457680000 0.5273710000 1.3991770000
O 5.9873310000 -0.7795750000 -0.0954540000
H 6.5024320000 -1.5260950000 0.2190330000
H 4.5212440000 -0.2798590000 2.6547020000
H 3.7926260000 -0.1621470000 2.5193460000
```

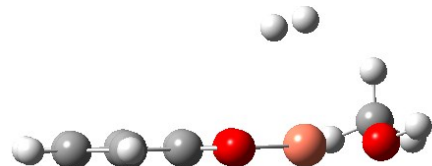

## H<sub>2</sub>\_CHCl<sub>3</sub>\_Ni

|    |               |               |               |
|----|---------------|---------------|---------------|
| C  | 7.6542490000  | 0.1136500000  | -0.9311850000 |
| C  | 8.9892730000  | 0.4699100000  | -1.0042240000 |
| C  | 9.3620750000  | 1.7914540000  | -1.2530740000 |
| C  | 8.4048240000  | 2.7731900000  | -1.4372220000 |
| C  | 7.0587280000  | 2.4158390000  | -1.3666550000 |
| C  | 6.6878620000  | 1.1017650000  | -1.1153360000 |
| H  | 7.3841820000  | -0.9197180000 | -0.7343320000 |
| H  | 8.7142620000  | 3.7956350000  | -1.6328910000 |
| H  | 6.2963180000  | 3.1757010000  | -1.5097970000 |
| H  | 5.6362310000  | 0.8364440000  | -1.0625990000 |
| O  | 10.6991140000 | 2.0100530000  | -1.2934380000 |
| O  | 10.0207360000 | -0.3950220000 | -0.8483110000 |
| Ni | 11.5570840000 | 0.4792610000  | -1.0206820000 |
| C  | 14.3701590000 | -0.2851070000 | -0.8441420000 |
| H  | 14.9432480000 | -0.6134520000 | -1.7084040000 |
| Cl | 13.7211600000 | 1.3573740000  | -1.2079550000 |
| Cl | 12.9415360000 | -1.3741390000 | -0.6852840000 |
| Cl | 15.3694170000 | -0.3008510000 | 0.5808850000  |
| H  | 12.6236860000 | 0.7745940000  | 1.9282140000  |
| H  | 12.0079720000 | 1.0552910000  | 1.6019360000  |

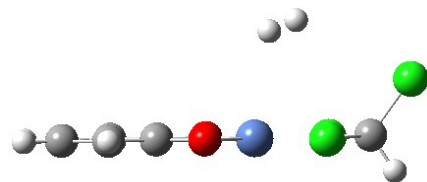

## H<sub>2</sub>\_DMF\_Ni

|    |               |               |               |
|----|---------------|---------------|---------------|
| C  | -0.0335970000 | 0.3745410000  | 0.1440610000  |
| C  | -0.0369670000 | 0.3260100000  | 1.5287250000  |
| C  | 1.1427060000  | 0.0634000000  | 2.2305630000  |
| C  | 2.3328590000  | -0.1517010000 | 1.5570060000  |
| C  | 2.3362850000  | -0.1023340000 | 0.1633110000  |
| C  | 1.1645670000  | 0.1582200000  | -0.5348610000 |
| H  | -0.9600340000 | 0.5795370000  | -0.3845820000 |
| H  | 3.2402880000  | -0.3540890000 | 2.1194960000  |
| H  | 3.2639010000  | -0.2693120000 | -0.3762460000 |
| H  | 1.1778660000  | 0.1941930000  | -1.6201680000 |
| O  | 1.0081100000  | 0.0426430000  | 3.5753190000  |
| O  | -1.1300710000 | 0.5205220000  | 2.2918850000  |
| Ni | -0.7052460000 | 0.3698570000  | 4.0259560000  |
| N  | 1.1741230000  | -0.1093390000 | 7.5723340000  |
| C  | 2.5389660000  | -0.3822860000 | 7.9722740000  |
| H  | 3.1723700000  | -0.4826730000 | 7.0895900000  |
| H  | 2.9223820000  | 0.4347420000  | 8.5926330000  |
| H  | 2.5864850000  | -1.3110010000 | 8.5506510000  |
| C  | 0.1998110000  | 0.0617670000  | 8.6326210000  |
| H  | 0.4786500000  | 0.9129450000  | 9.2625500000  |
| H  | -0.7813930000 | 0.2395150000  | 8.1953680000  |
| H  | 0.1655360000  | -0.8382150000 | 9.2551020000  |
| C  | 0.8402900000  | -0.0118280000 | 6.2910060000  |
| H  | 1.6452960000  | -0.1535600000 | 5.5570730000  |
| O  | -0.3165390000 | 0.2272890000  | 5.9081240000  |
| H  | -2.1590220000 | 1.0508640000  | 4.4059150000  |
| H  | -2.3164160000 | 0.2581080000  | 4.3430070000  |

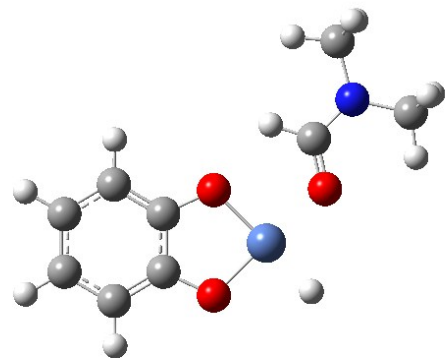



## H<sub>2</sub>\_Ethanol\_Ni

```
C 7.9264850000 0.0460780000 -1.1871640000
C 9.2642900000 -0.0460670000 -1.5355130000
C 10.1258080000 1.0326080000 -1.3269760000
C 9.6645410000 2.2121130000 -0.7688750000
C 8.3187500000 2.3049090000 -0.4184650000
C 7.4601260000 1.2329100000 -0.6259820000
H 7.2702110000 -0.8023790000 -1.3561490000
H 10.3518120000 3.0390810000 -0.6152780000
H 7.9420250000 3.2243730000 0.0192770000
H 6.4137130000 1.3166100000 -0.3481860000
O 11.4077280000 0.8141150000 -1.7076290000
O 9.8297150000 -1.1433130000 -2.0840420000
Ni 11.5627440000 -0.8375570000 -2.3854850000
C 14.4407260000 -1.9273530000 -1.2212140000
H 15.1841020000 -2.0542040000 -0.4301350000
H 14.7559150000 -2.5196770000 -2.0854370000
H 13.4891090000 -2.3210360000 -0.8485850000
C 14.3206360000 -0.4755310000 -1.5821940000
H 13.9105400000 0.1188360000 -0.7577300000
H 15.2879130000 -0.0569380000 -1.8804070000
O 13.4299030000 -0.3488880000 -2.7183040000
H 13.2822380000 0.5978150000 -2.8663550000
H 11.7444530000 -2.4521570000 -2.6601860000
H 11.6025600000 -2.1347660000 -3.3944080000
```

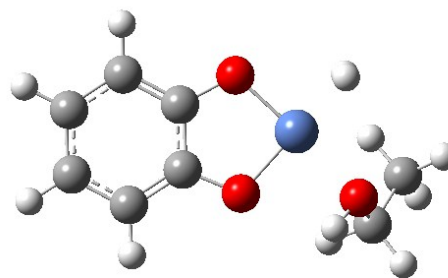

## H<sub>2</sub>\_H<sub>2</sub>O\_Ni

```
C 7.6048410000 0.3617610000 -1.1300750000
C 8.9178400000 0.6168570000 -0.7701010000
C 9.3024860000 1.8924120000 -0.3553220000
C 8.3867920000 2.9272100000 -0.2941670000
C 7.0654120000 2.6708550000 -0.6559470000
C 6.6801140000 1.4022270000 -1.0693110000
H 7.3217680000 -0.6362910000 -1.4505270000
H 8.7075680000 3.9122250000 0.0320490000
H 6.3340570000 3.4720850000 -0.6123830000
H 5.6478840000 1.2151880000 -1.3495170000
O 10.6150840000 2.0053970000 -0.0350370000
O 9.9013710000 -0.3109780000 -0.7877460000
Ni 11.4324440000 0.4263260000 -0.2489450000
H 13.7008440000 1.5981040000 -0.1912150000
H 12.5275650000 2.2322020000 0.6111370000
O 12.9981660000 1.3973970000 0.4352020000
H 12.2171110000 -0.8972380000 -0.8195700000
H 12.0710780000 -1.0691580000 -0.0366040000
```

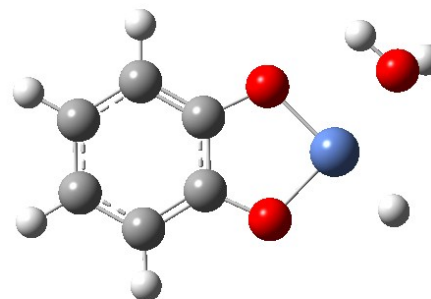

## H<sub>2</sub>\_Methanol\_Ni

|    |               |               |               |
|----|---------------|---------------|---------------|
| C  | 7.5223720000  | 0.2832710000  | -1.8601810000 |
| C  | 8.7059930000  | 0.4180610000  | -1.1543900000 |
| C  | 8.8885530000  | 1.4995350000  | -0.2886030000 |
| C  | 7.8848180000  | 2.4268950000  | -0.0802460000 |
| C  | 6.6896760000  | 2.2837220000  | -0.7844670000 |
| C  | 6.5141550000  | 1.2258700000  | -1.6665690000 |
| H  | 7.3962510000  | -0.5554410000 | -2.5381460000 |
| H  | 8.0458340000  | 3.2493920000  | 0.6108760000  |
| H  | 5.8941500000  | 3.0082900000  | -0.6400360000 |
| H  | 5.5784810000  | 1.1247100000  | -2.2082860000 |
| O  | 10.1108630000 | 1.5559540000  | 0.3101450000  |
| O  | 9.7430640000  | -0.4440080000 | -1.2206830000 |
| Ni | 11.0151390000 | 0.0801880000  | -0.1145240000 |
| C  | 13.1003940000 | 1.7611670000  | 0.8480160000  |
| H  | 13.6175370000 | 1.6265390000  | -0.1014220000 |
| H  | 13.8298660000 | 1.9678910000  | 1.6338410000  |
| H  | 12.3658930000 | 2.5651590000  | 0.7610820000  |
| O  | 12.4290990000 | 0.5168760000  | 1.1343550000  |
| H  | 11.9923510000 | 0.5948570000  | 1.9923400000  |
| H  | 9.5878740000  | 0.8173040000  | 2.5138980000  |
| H  | 9.4915610000  | 0.6830830000  | 3.2480320000  |

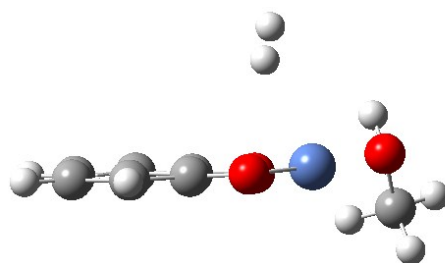

Supplement: c9cp00754g1.pdf [file c9cp00754g1.pdf]
